# Supplementary material for: How to help children with neurodevelopmental and visual problems: a scoping review
Source: PubMed Central journal article supplement — Br J Ophthalmol. 2013 Oct 24;98(1):6–12. doi: 10.1136/bjophthalmol-2013-304225 (PMC4030252; doi:10.1136/bjophthalmol-2013-304225), 2013-10-24
Supplement: bjophthalmol-2013-304225-s1.pdf [file bjophthalmol-2013-304225-s1.pdf]

## Medline Search Strategy

Run in January 2011. Dates: 1950 to 2011.

1. exp Brain Injuries/
2. exp Learning Disorders/
3. exp Mental Retardation/
4. Cognition Disorders/
5. Developmental Disabilities/
6. Cerebral Palsy/
7. Attention/
8. exp Child Development Disorders, Pervasive/
9. Language Development Disorders/
10. exp Social Behavior Disorders/
11. exp Down Syndrome/
12. attention deficit.tw.
13. child development disorder\$.tw.
14. brain injur\$.tw.
15. neuronal injur\$.tw.
16. brain function\$.tw.
17. (brain adj5 vision adj5 injur\$.tw.
18. learning difficulties.tw.
19. (abnormal\$ adj5 cogniti\$.tw.
20. learning disabilit\$.tw.
21. neurodevelopmental problem\$.tw.
22. neuro-developmental.tw.
23. down syndrome.tw.
24. down's syndrome.tw.
25. (development adj5 nervous system).tw.
26. (adverse adj5 development\$.tw.
27. mental retard\$.tw.
28. cerebral palsy.tw.
29. cognition disorder\$.tw.
30. learning disorder\$.tw.
31. development\$ disabilit\$.tw.
32. language development\$ disorder\$.tw.
33. cognit\$ disorder\$.tw.
34. social behavio?r disorder\$.tw.
35. exp Vision Disorders/
36. Visually Impaired Persons/
37. exp Refractive Errors/
38. exp Blindness/
39. exp Color blindness/
40. (vision adj3 loss).tw.
41. low vision.tw.
42. vision disorder\$.tw.
43. (visual\$ adj3 impair\$.tw.

44. blindness.tw.
45. (nervous system adj5 visual).tw.
46. vision deficit\$.tw.
47. refractive error\$.tw.
48. under-accommodation.tw.
49. low accommodation.tw.
50. reduced accommodation.tw.
51. amblyopia.tw.
52. diplopia.tw.
53. color vision defect\$.tw.
54. color blind\$.tw.
55. hemianopsia.tw.
56. hemianopia.tw.
57. photophobia.tw.
58. scotoma.tw.
59. exp Ocular Motility Disorders/
60. ocular motility disorder\$.tw.
61. exp Strabismus/
62. strabismus.tw.
63. vision problem\$.tw.
64. (vision adj5 intervention\$.tw.
65. special school\$.tw.
66. mainstream school\$.tw.
67. (development\$ adj5 vision adj5 clinic\$.tw.
68. (vis\$ adj5 clinic\$.tw.
69. Eyeglasses/
70. eyeglasses.tw.
71. glasses.tw.
72. spectacles.tw.
73. bifocal\$.tw.
74. intervention\$.tw.
75. program\$.tw.
76. treatment\$.tw.
77. (support\$ adj5 teacher\$.tw.
78. therap\$.tw.
79. perceptual disorders/ or agnosia/
80. percept\$ disorder\$.tw.
81. perceptual defect\$.tw.
82. percept\$ defect\$.tw.
83. agnosia.tw.
84. vis\* processing.tw.
85. vis\* def\*.tw.
86. visual field defect\*.tw.
87. exp eye diseases/ or optic nerve diseases/
88. (eye adj5 diseas\$.tw.
89. (optic nerve adj5 diseas\$.tw.

90. nystagmus.tw.

91. 1 or 2 or 3 or 4 or 5 or 6 or 7 or 8 or 9 or 10 or 11 or 12 or 13 or 14 or 15 or 16 or 17 or 18 or 19 or 20 or 21 or 22 or 23 or 24 or 25 or 26 or 27 or 28 or 29 or 30 or 31 or 32 or 33 or 34

92. 35 or 36 or 37 or 38 or 39 or 40 or 41 or 42 or 43 or 44 or 45 or 46 or 47 or 48 or 49 or 50 or 51 or 52 or 53 or 54 or 55 or 56 or 57 or 58 or 59 or 60 or 61 or 62 or 63 or 79 or 80 or 81 or 82 or 83 or 84 or 85 or 86 or 87 or 88 or 89 or 90 or 91 or 92

93. 64 or 65 or 66 or 67 or 68 or 69 or 70 or 71 or 72 or 73 or 74 or 75 or 76 or 77 or 78

94. 93 and 94 and 95

95. limit 96 to humans

96. limit 97 to "all child (0 to 18 years)"
